# Supplementary material
Source: Springer Nature journal article supplement (https://www.springermedizin.de/resource/supplementary/12950_2011_228_MOESM1_ESM.pdf/9558248)

**A**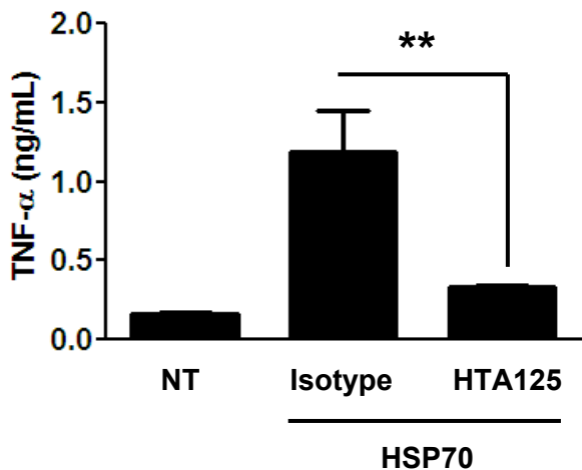**B**

- Vehicle
- Polymyxin B

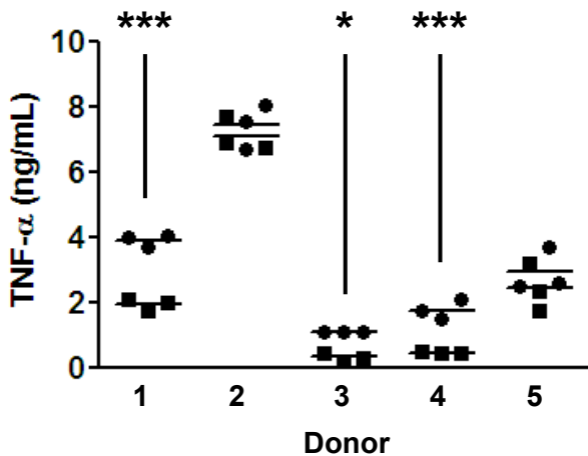

Supplement: MOESM1 [file 9558248]
